# Supplementary material for: System Wide Analysis of the Evolution of Innate Immunity in the Nematode Model Species Caenorhabditis elegans and Pristionchus pacificus
Source: PubMed Central journal article supplement (PMC3461006; doi:10.1371/journal.pone.0044255), 2012-09-28

## Supplementary Figure S1 : Long term survival curves for *P. pacificus* on various pathogens.

*P. pacificus* has higher resistance than *C. elegans* to *B. thuringiensis* and *S. aureus*, seen as longer median survival time of about 8 days on these pathogens

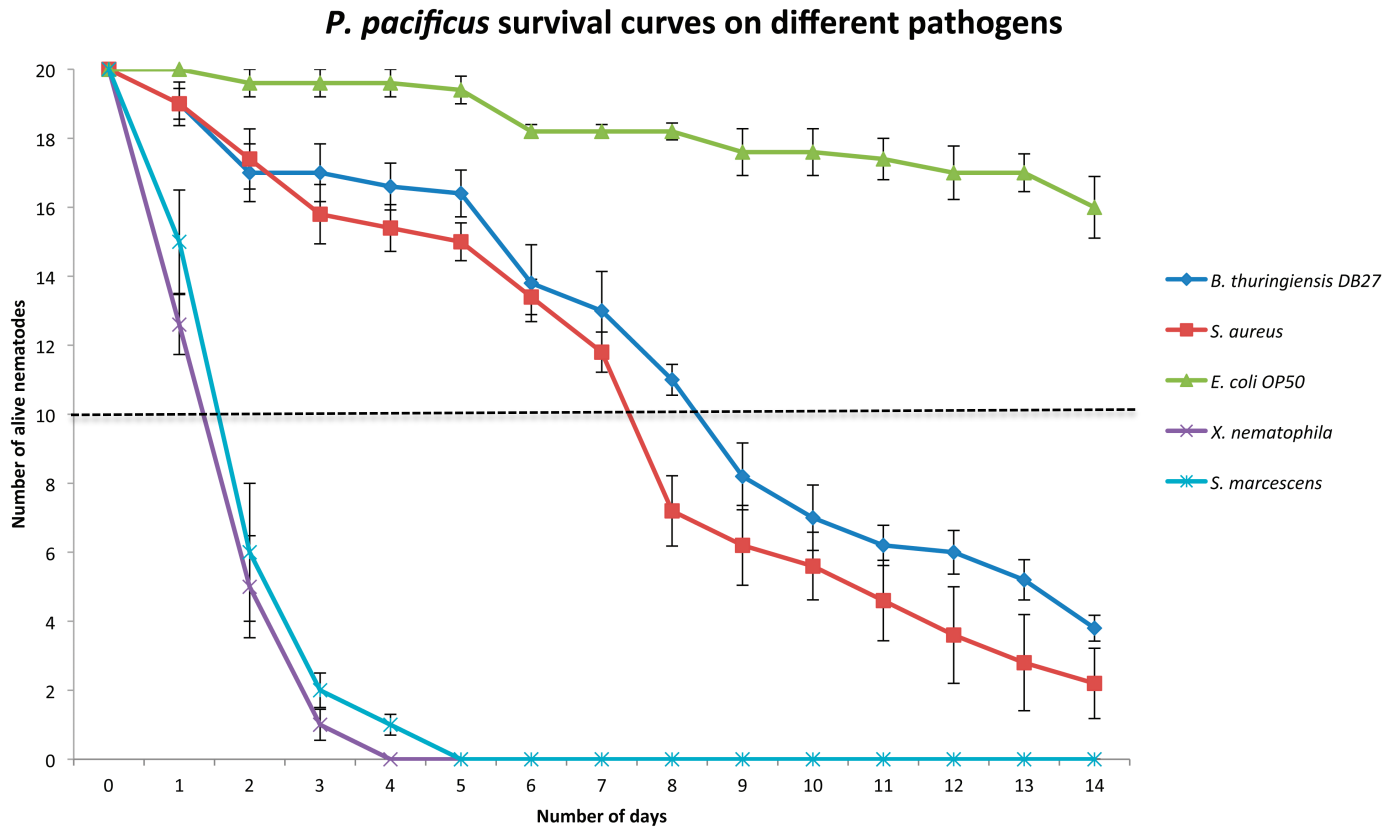

Supplement: pone.0044255.s001.pdf [file pone.0044255.s001.pdf]
