# Supplementary material for: System Wide Analysis of the Evolution of Innate Immunity in the Nematode Model Species Caenorhabditis elegans and Pristionchus pacificus
Source: PubMed Central journal article supplement (PMC3461006; doi:10.1371/journal.pone.0044255), 2012-09-28

Supplementary Figure S2 : Global transcriptional suppression in response to pathogens in (A) *C. elegans* (B) *P. pacificus*

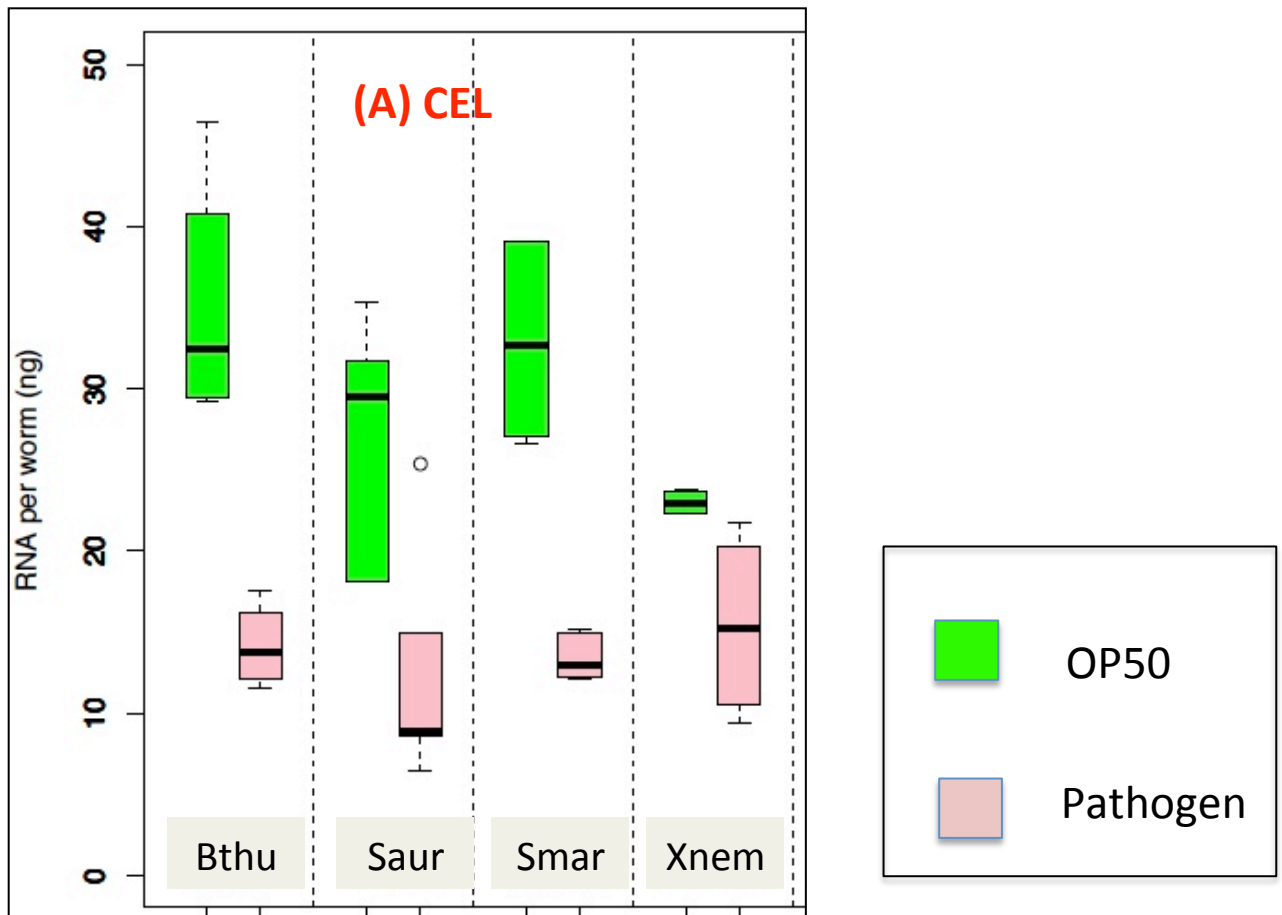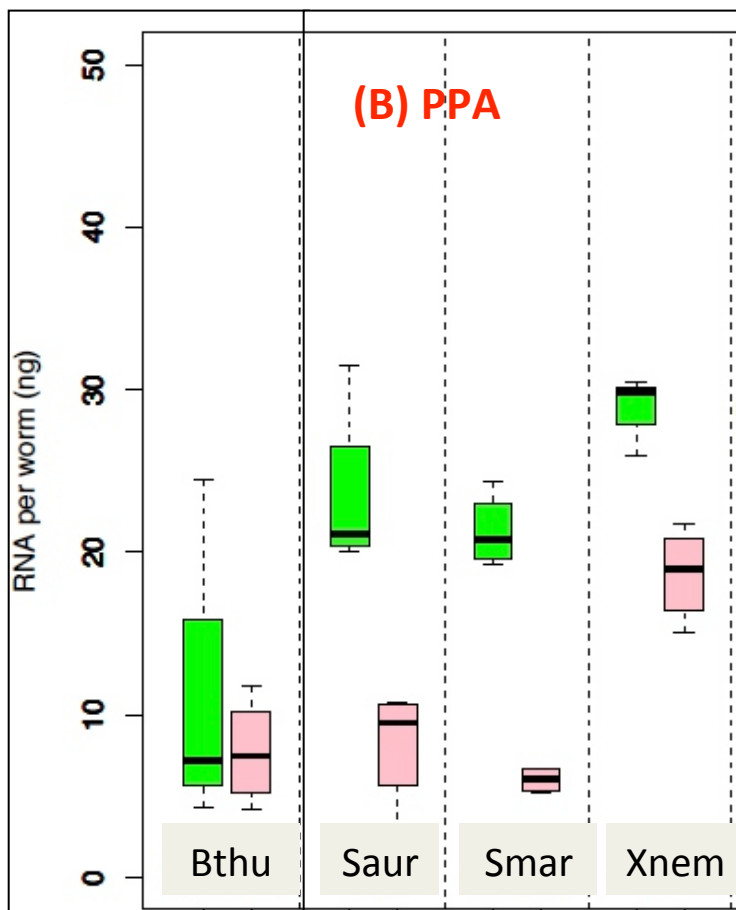

Supplement: pone.0044255.s002.pdf [file pone.0044255.s002.pdf]
