# Supplementary material for: System Wide Analysis of the Evolution of Innate Immunity in the Nematode Model Species Caenorhabditis elegans and Pristionchus pacificus
Source: PubMed Central journal article supplement (PMC3461006; doi:10.1371/journal.pone.0044255), 2012-09-28

Supplementary Figure S3 : Overlap between pioneer genes regulated in *P. pacificus* in response to the four pathogens

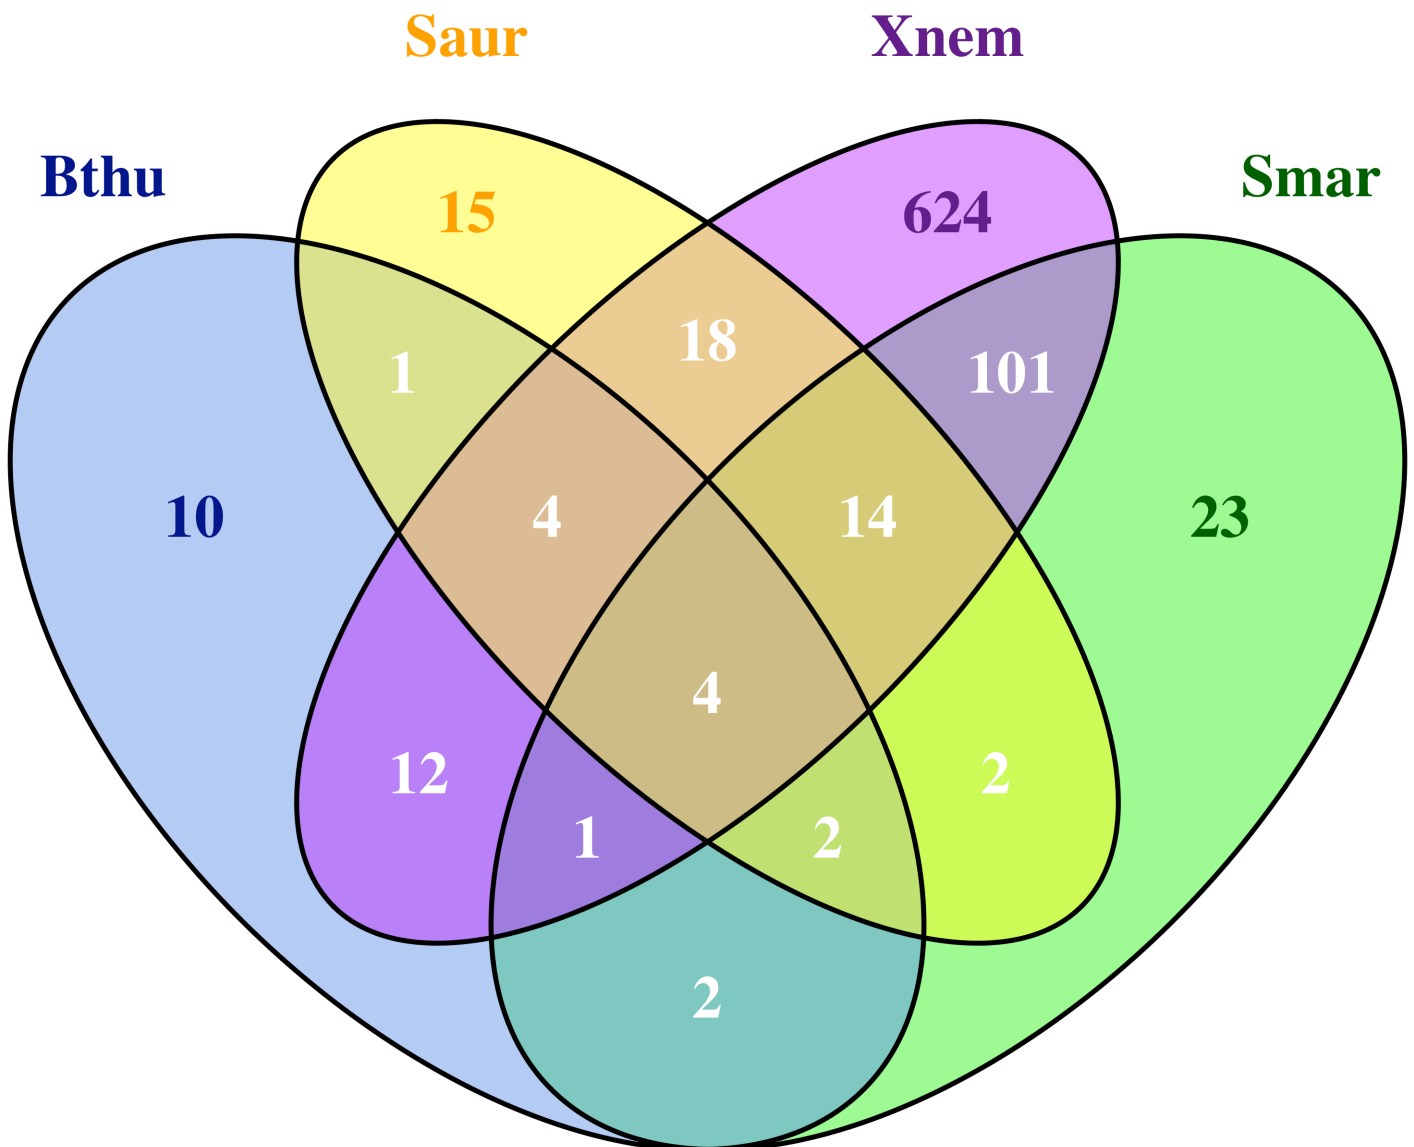

Supplement: pone.0044255.s003.pdf [file pone.0044255.s003.pdf]
