# Supplementary material for: System Wide Analysis of the Evolution of Innate Immunity in the Nematode Model Species Caenorhabditis elegans and Pristionchus pacificus
Source: PubMed Central journal article supplement (PMC3461006; doi:10.1371/journal.pone.0044255), 2012-09-28

**Supplementary Figure S5 .Pioneer genes are expressed at higher levels than non-pioneer genes in each of the pathogen-induced expression profiles on *P. pacificus*.**

**(A) *B. thuringiensis***

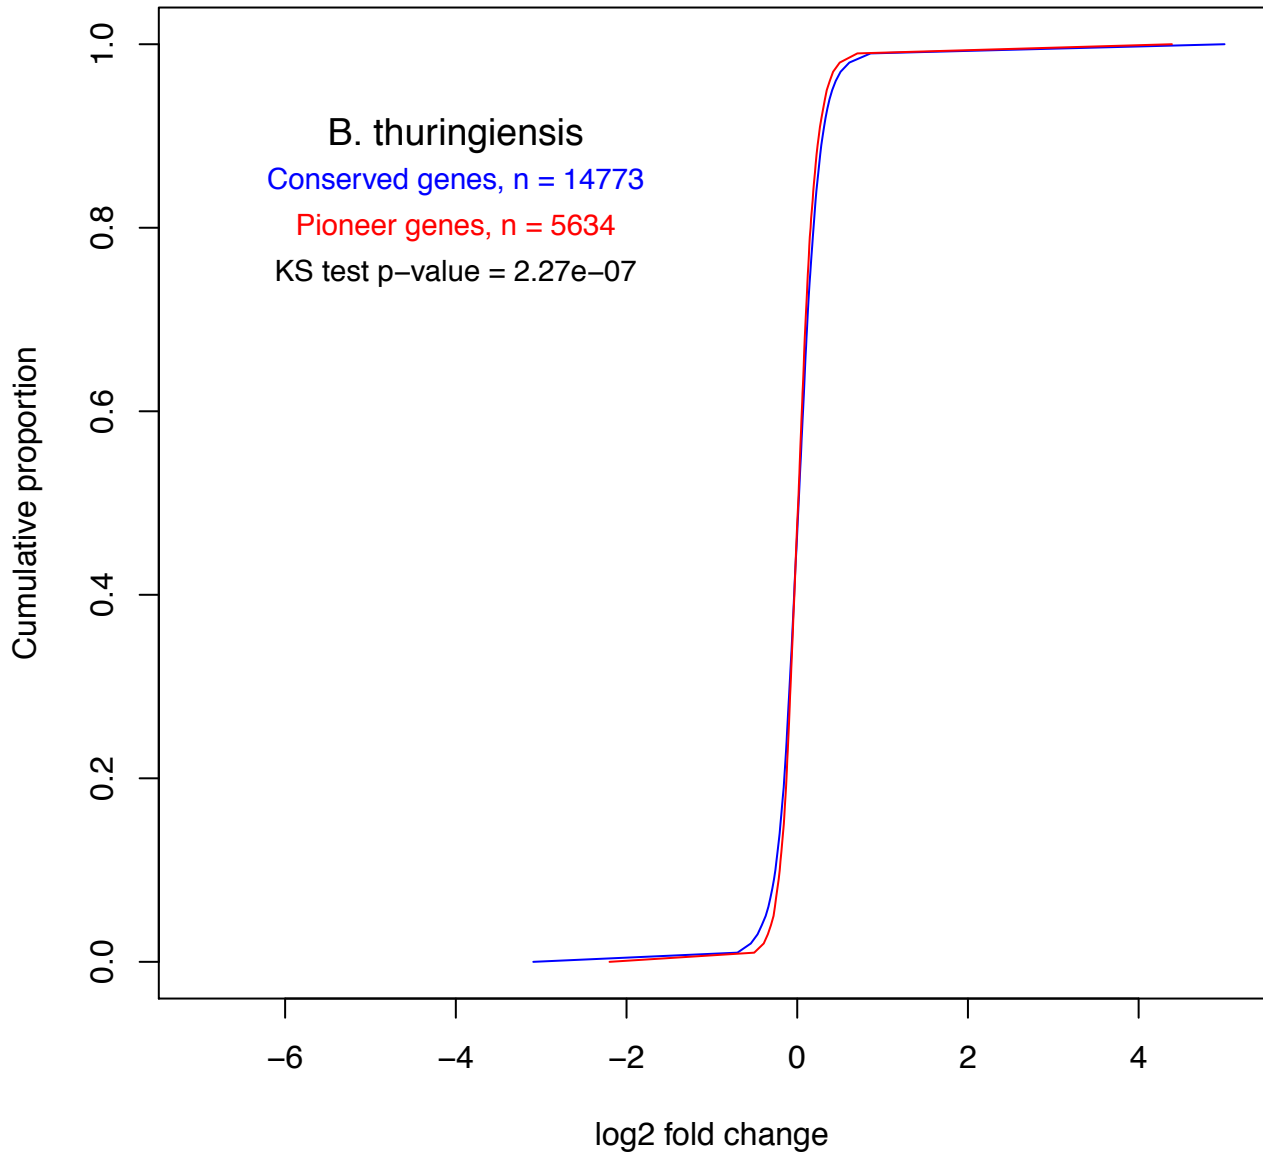

**Supplementary Figure S5 .Pioneer genes are expressed at higher levels than non-pioneer genes in each of the pathogen-induced expression profiles on *P. pacificus*.**

**(B) : *S. aureus***

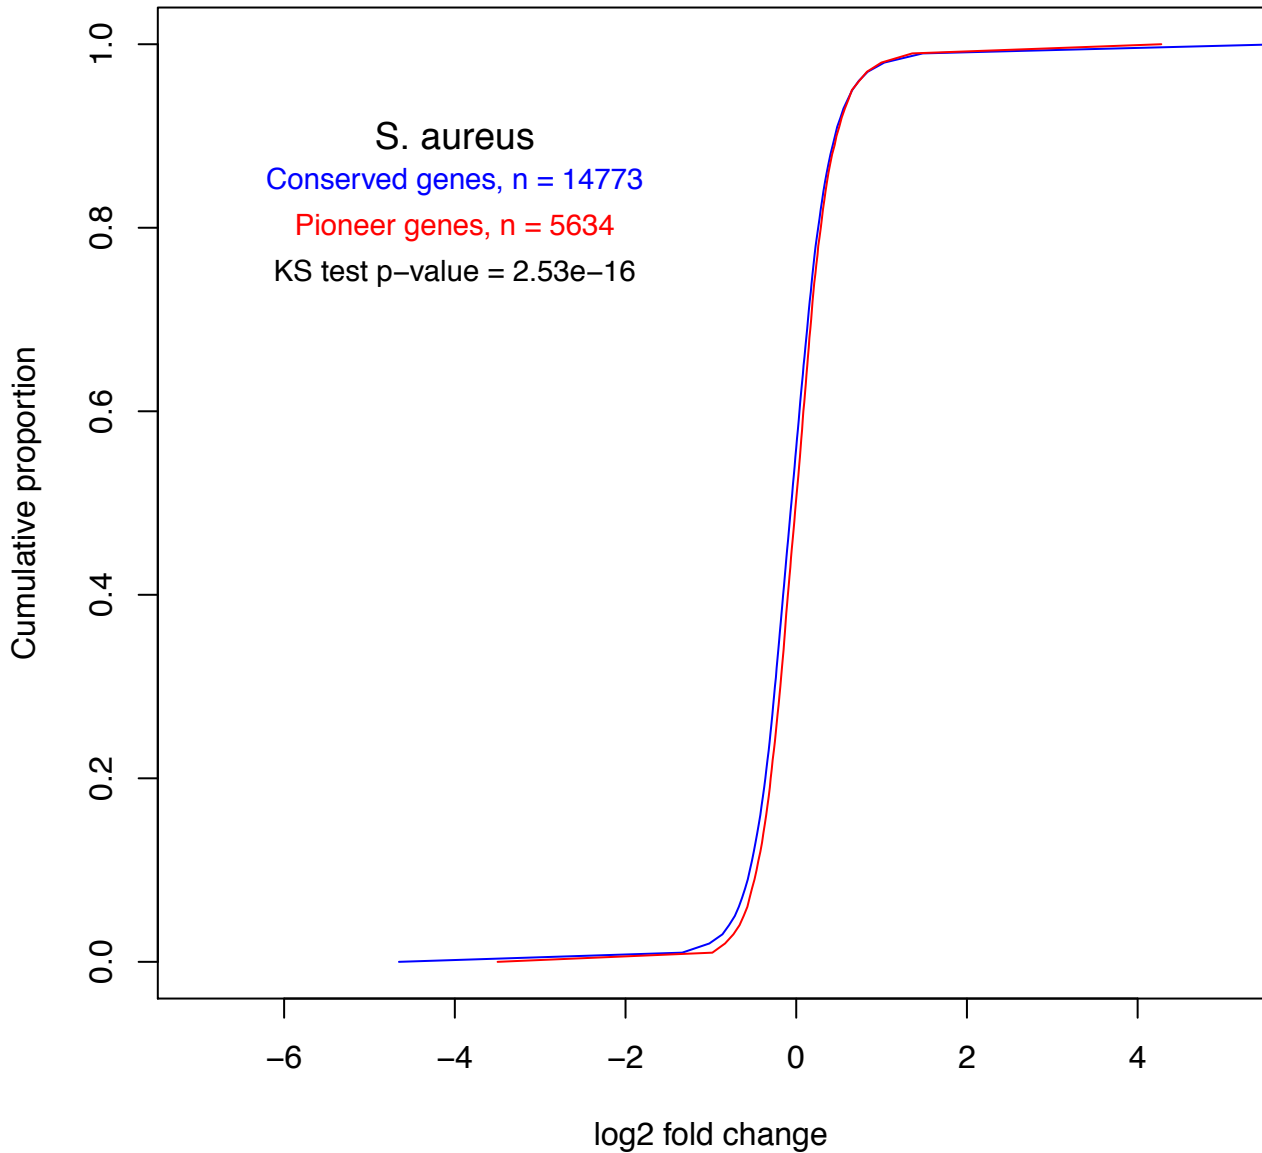

**Supplementary Figure S5 .Pioneer genes are expressed at higher levels than non-pioneer genes in each of the pathogen-induced expression profiles on *P. pacificus*.**

**(C) : *S. marcescens***

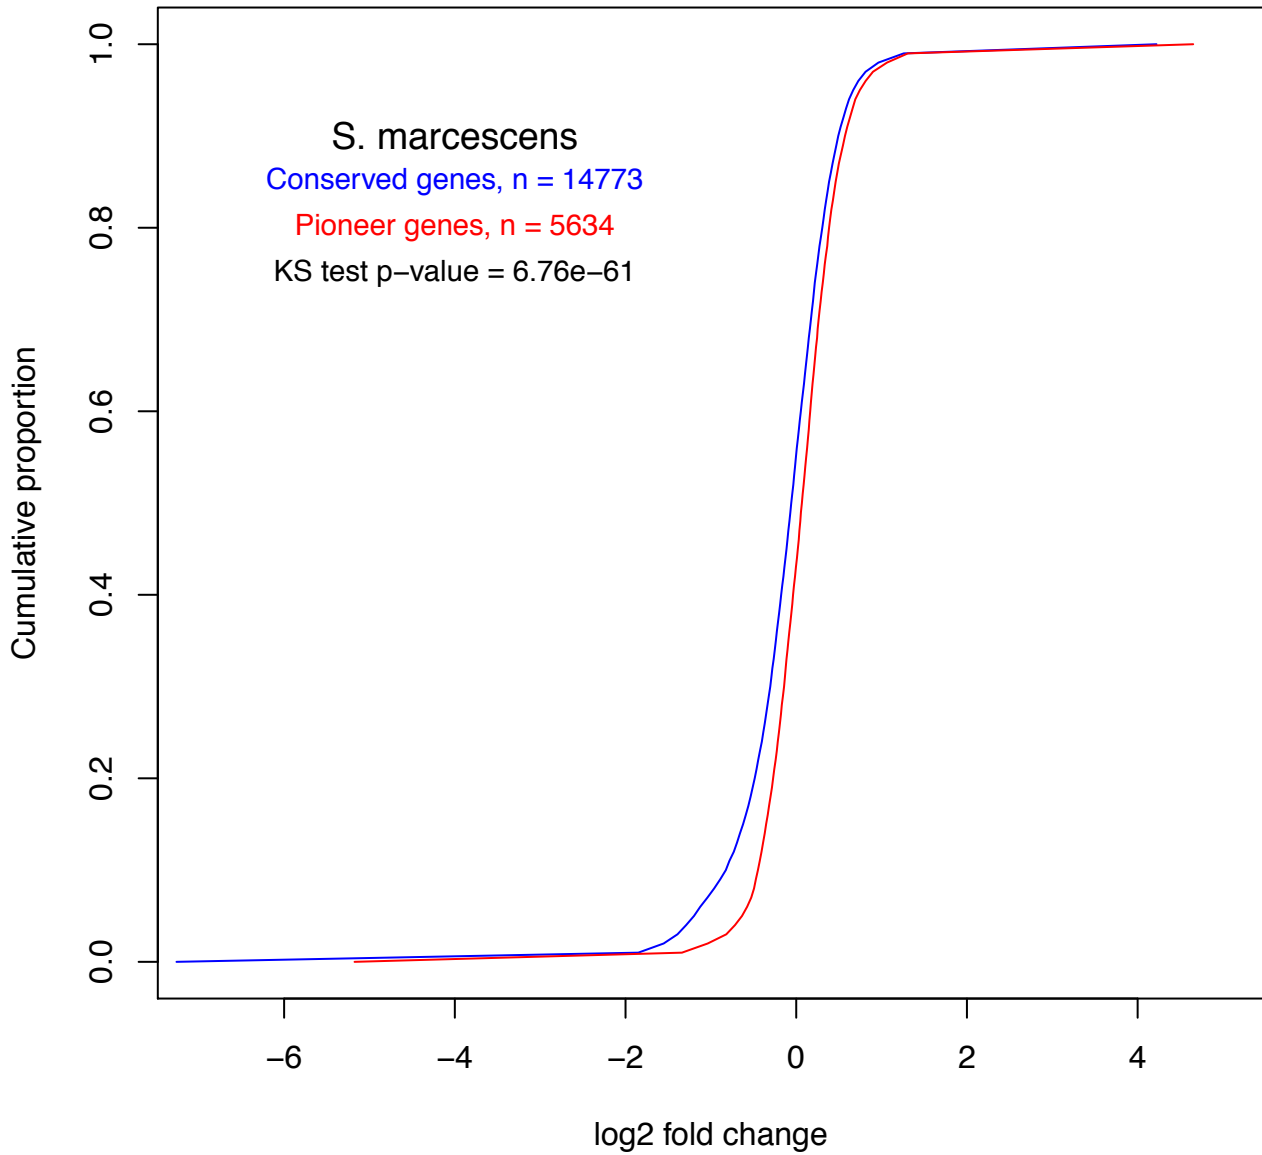

**Supplementary Figure S5 .Pioneer genes are expressed at higher levels than non-pioneer genes in each of the pathogen-induced expression profiles on *P. pacificus*.**

**(D) : *X. nematophila***

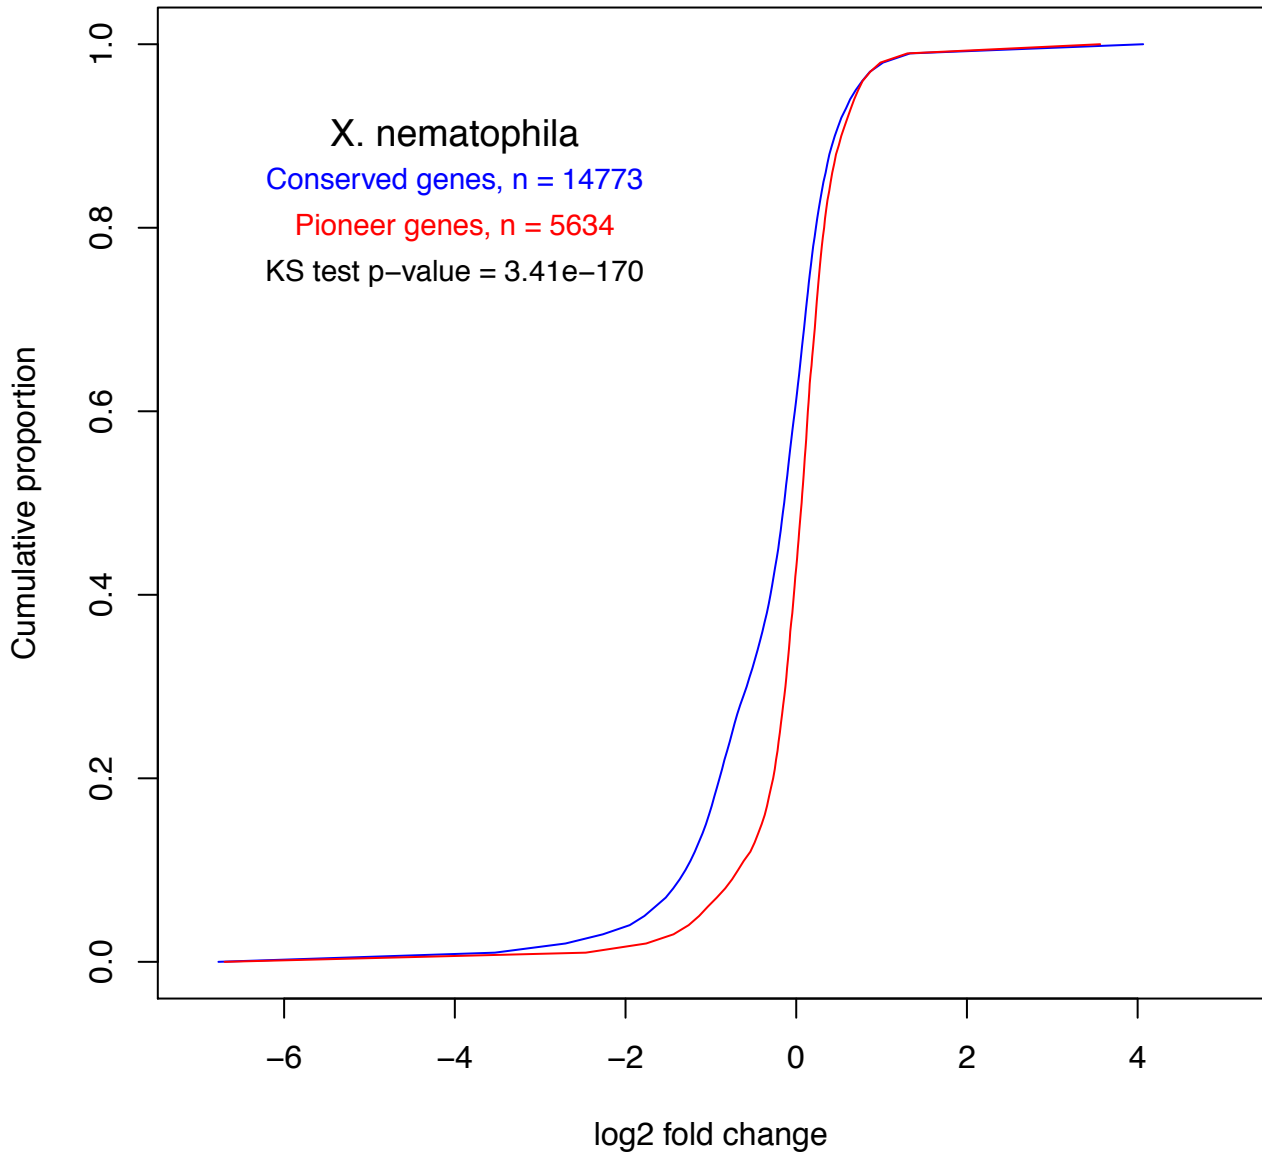

Supplement: pone.0044255.s005.pdf [file pone.0044255.s005.pdf]
