# Supplementary material for: System Wide Analysis of the Evolution of Innate Immunity in the Nematode Model Species Caenorhabditis elegans and Pristionchus pacificus
Source: PLoS One. 2012 Sep 28;7(9):e44255. doi: 10.1371/journal.pone.0044255 (PMC3461006; doi:10.1371/journal.pone.0044255)
Supplement: Table S8 — GO enrichment analysis of genes common across both C. elegans and P. pacificus profiles obtained upon exposure to gram-negative bacteria S. marcescens and X. nematophila . (XLSX) [file pone.0044255.s013.xlsx]

## Sheet: Table-S8(A)
Table S8 (A) : Gene Ontology enrichment analysis for genes differentially expressed across both C. elegans and P. pacificus when exposed to the gram negative pathogens S. marcescens and X. nematophila. Interesting items are highlighted in green rows.
(A) GO : Biological Process
GO.ID	Term	Total annotated genes in genome	Genes observed to be differentially expressed	Genes expected to be observed just by chance	p-value of enichment
GO:0002119	nematode larval development	1279	173	98.47	2.6e-18
GO:0000003	reproduction	1448	174	111.48	4e-10
GO:0040007	growth	1707	195	131.42	1.6e-08
GO:0008340	determination of adult lifespan	402	59	30.95	4.3e-07
GO:0006898	receptor-mediated endocytosis	497	67	38.26	1.6e-06
GO:0040010	positive regulation of growth rate	1195	129	92	4.5e-06
GO:0015986	ATP synthesis coupled proton transport	25	10	1.92	7.4e-06
GO:0006412	translation	185	37	14.24	9.7e-06
GO:0040035	hermaphrodite genitalia development	496	59	38.19	0.00031
GO:0046165	alcohol biosynthetic process	6	4	0.46	0.00046
GO:0040019	positive regulation of embryonic develop...	16	6	1.23	0.00082
GO:0006544	glycine metabolic process	7	4	0.54	0.001
GO:0006457	protein folding	53	11	4.08	0.00193
GO:0007067	mitosis	39	9	3	0.00229
GO:0006414	translational elongation	14	5	1.08	0.00294
GO:0009069	serine family amino acid metabolic proce...	12	7	0.92	0.00392
GO:0006098	pentose-phosphate shunt	5	3	0.38	0.00403
GO:0043648	dicarboxylic acid metabolic process	5	3	0.38	0.00403
GO:0042773	ATP synthesis coupled electron transport	5	3	0.38	0.00403
GO:0006006	glucose metabolic process	21	9	1.62	0.00731
GO:0000398	nuclear mRNA splicing via spliceosome	6	3	0.46	0.00759
GO:0000910	cytokinesis	84	13	6.47	0.01115
GO:0006099	tricarboxylic acid cycle	8	3	0.62	0.01893
GO:0046395	carboxylic acid catabolic process	15	4	1.15	0.02387
GO:0051128	regulation of cellular component organiz...	9	3	0.69	0.02679
GO:0048477	oogenesis	39	7	3	0.02717
GO:0006413	translational initiation	16	4	1.23	0.02994
GO:0006096	glycolysis	10	3	0.77	0.03614
GO:0006605	protein targeting	17	4	1.31	0.03685
GO:0000278	mitotic cell cycle	73	15	5.62	0.03978
GO:0006399	tRNA metabolic process	61	9	4.7	0.04201
GO:0009309	amine biosynthetic process	34	6	2.62	0.04267
GO:0006631	fatty acid metabolic process	18	4	1.39	0.04459
GO:0042254	ribosome biogenesis	26	5	2	0.04511

## Sheet: Table-S8(B)
Table S8 (B): Gene Ontology enrichment analysis for genes differentially expressed across both C. elegans and P. pacificus when exposed to the gram negative pathogens S. marcescens and X. nematophila. Interesting items are highlighted in green rows.
(B) GO : Cellular Component
GO.ID	Term	Total annotated genes in genome	Genes observed to be differentially expressed	Genes expected to be observed just by chance	p-value of enichment
GO:0005840	ribosome	107	23	5.66	6.2e-08
GO:0045261	proton-transporting ATP synthase complex...	5	5	0.26	3.9e-07
GO:0005737	cytoplasm	493	76	26.1	4.5e-07
GO:0000276	mitochondrial proton-transporting ATP sy...	5	3	0.26	0.0013
GO:0005783	endoplasmic reticulum	45	8	2.38	0.0021
GO:0030529	ribonucleoprotein complex	125	27	6.62	0.0089
GO:0005739	mitochondrion	56	12	2.96	0.0091
GO:0043234	protein complex	238	31	12.6	0.0118
GO:0015935	small ribosomal subunit	10	3	0.53	0.0133
GO:0044446	intracellular organelle part	203	28	10.75	0.015
GO:0044444	cytoplasmic part	314	53	16.62	0.0155
GO:0005694	chromosome	32	5	1.69	0.0247
GO:0005643	nuclear pore	6	2	0.32	0.0363
GO:0031966	mitochondrial membrane	30	7	1.59	0.0382
GO:0031967	organelle envelope	43	11	2.28	0.0455
GO:0000502	proteasome complex	16	3	0.85	0.0491

## Sheet: Table-S8(C)
Table S8 (C): Gene Ontology enrichment analysis for genes differentially expressed across both C. elegans and P. pacificus when exposed to the gram negative pathogens S. marcescens and X. nematophila. Interesting items are highlighted in green rows.
(C) GO : Molecular Function
GO.ID	Term	Total annotated genes in genome	Genes observed to be differentially expressed	Genes expected to be observed just by chance	p-value of enichment
GO:0003735	structural constituent of ribosome	106	23	7.83	1.6e-06
GO:0046933	hydrogen ion transporting ATP synthase a...	9	6	0.66	1.1e-05
GO:0046961	proton-transporting ATPase activity rot...	10	5	0.74	0.00039
GO:0003746	translation elongation factor activity	9	4	0.66	0.00273
GO:0016835	carbon-oxygen lyase activity	15	5	1.11	0.00344
GO:0030170	pyridoxal phosphate binding	38	8	2.81	0.00556
GO:0016887	ATPase activity	142	23	10.49	0.00647
GO:0004129	cytochrome-c oxidase activity	7	3	0.52	0.01116
GO:0016853	isomerase activity	44	8	3.25	0.0137
GO:0015078	hydrogen ion transmembrane transporter a...	39	14	2.88	0.01446
GO:0003723	RNA binding	132	22	9.75	0.01909
GO:0000166	nucleotide binding	771	71	56.94	0.02027
GO:0016616	oxidoreductase activity acting on the C...	39	7	2.88	0.02205
GO:0000287	magnesium ion binding	33	6	2.44	0.03128
GO:0003743	translation initiation factor activity	17	4	1.26	0.03218
GO:0008137	NADH dehydrogenase (ubiquinone) activity	10	3	0.74	0.0324
GO:0009378	four-way junction helicase activity	11	3	0.81	0.04217
GO:0004386	helicase activity	86	13	6.35	0.04512
GO:0046912	transferase activity transferring acyl ...	5	2	0.37	0.04682
GO:0016624	oxidoreductase activity acting on the a...	5	2	0.37	0.04682
